# Supplementary material
Source: MDPI journal article supplement (https://www.mdpi.com/2073-4395/10/3/437)
Supplement: s1 [file s1]

Supplementary data

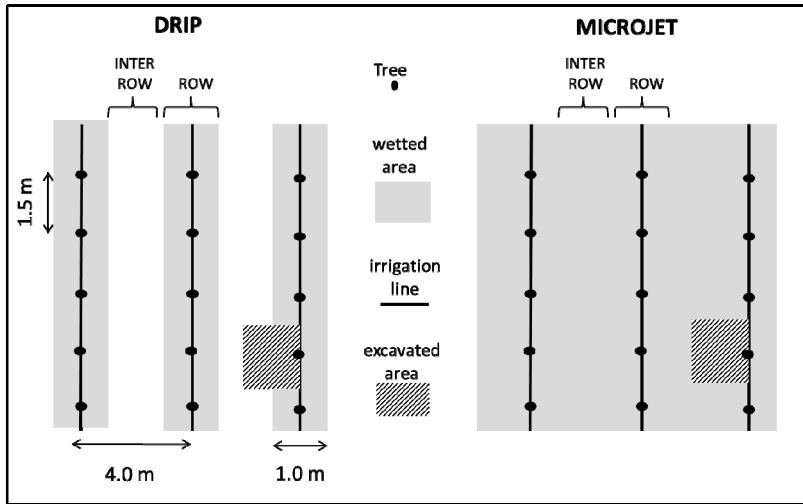

**Figure S1** - Schematic representation of the drip and microjet irrigation treatments and of wetted and excavated soil area.

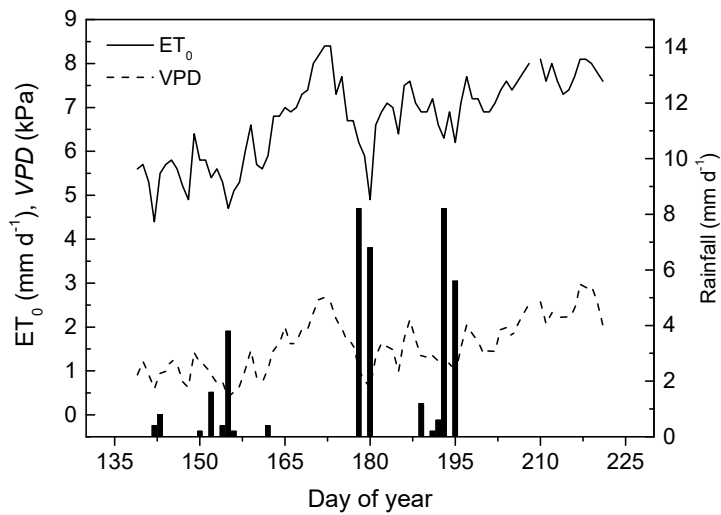

**Figure S2** - Daily values of rainfall (black bars) and daily reference evapotranspiration ( $ET_0$ ) (—) and vapor pressure deficit (VPD) (- - -) from DOY 141 to 220 (20<sup>th</sup> May to 8<sup>th</sup> August 2013).

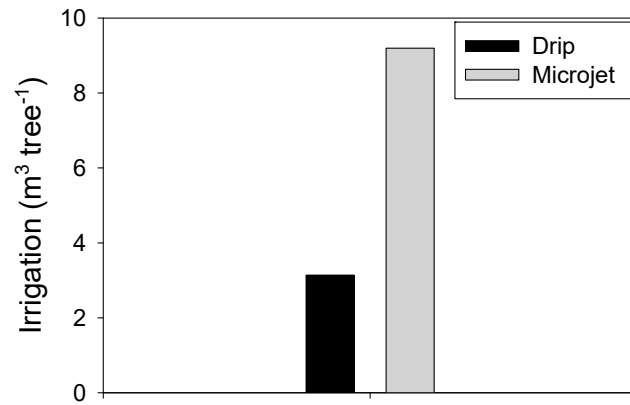

**Figure S3.** Irrigation volumes per tree during the experimental period (20 May-8 August 2013) for D (black column) and MJ (grey column) irrigated blocks.
